# Supplementary material
Source: MDPI journal article supplement (https://www.mdpi.com/2673-4583/10/1/4)

## Introduction

Long-term phosphorus (P) accumulation within agricultural soils is a challenge for water quality improvement schemes such as the EU WFD. Research has demonstrated the potential for reseeded and tillage to reduce soil surface nutrient accumulations.

## Reducing Soil Nutrient Accumulations

Reducing soil legacy is a slow process taking up to 20 years to draw down surplus soil P to more agronomically optimum levels. As such, it may be several years before any associated improvements in water quality are seen<sup>1-3</sup>

## Grassland Reseeding and Tillage

Reseeding and tillage inversion can reduce soil nutrient accumulations by causing a vertical stratification in soil P and increasing nutrient uptake<sup>4-6</sup>. Few studies have explored changes in sub-field scale nutrient content before and after reseeded with tillage inversion

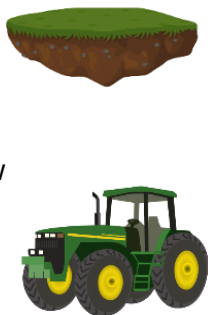

## Research Aim

Research aims to explore the usage of grassland reseeded and tillage to reduce soil surface P accumulations by using high-resolution gridded soil sampling at the sub-field scale to monitor changes before and after reseeded and tillage

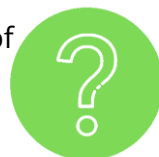

## Study Area

Blackwater catchment in NI and ROI, has issues of legacy P. Study site underwent reseeded in spring-summer 2020. Used to research sub-field scale nutrient variability

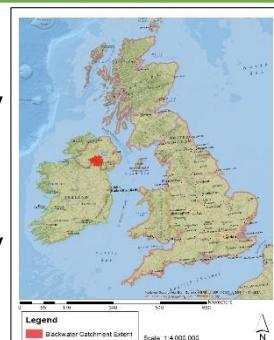

Fig 1. Location of Blackwater Catchment

## Methods

- 35 m gridded soil sampling and kriging used to quantify sub-field scale nutrient variability and associated laboratory analysis
- Sampling in Jan 2020 (before reseeded) and Feb 2021(after reseeded)

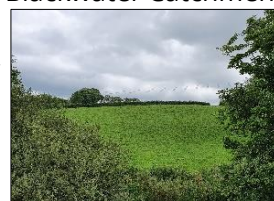

Study Site

## Results and Discussion

- Table 1 shows that after reseeded, largely decreases occurred in soil nutrient content (mg l<sup>-1</sup>).
- Fig 2a shows a soil P Index 3 hotspot present before reseeded in 2020 and Fig 2b shows that this hotspot was removed following reseeded and tillage with increased nutrient deficiency

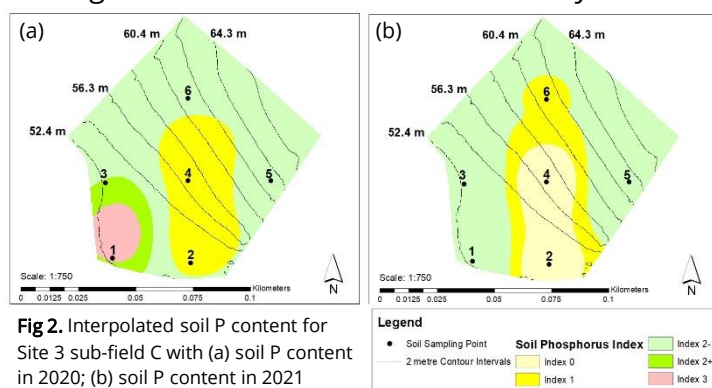

Fig 2. Interpolated soil P content for Site 3 sub-field C with (a) soil P content in 2020; (b) soil P content in 2021

| Sampling Point | Soil P Content | Soil K Content | Soil Mg Content | Soil S Content |
|----------------|----------------|----------------|-----------------|----------------|
| 1              | 36.7% decrease | 2.9% decrease  | 0.9% increase   | 8.9% increase  |
| 2              | 30.0% decrease | 7.7% decrease  | 6.6% decrease   | 4.9% decrease  |
| 3              | 11.9% decrease | 32.3% decrease | 17.3% decrease  | 9.1% decrease  |
| 4              | 52.0% decrease | 37.5% decrease | 14.2% decrease  | 18.9% decrease |
| 5              | 5.1% increase  | 4.6% increase  | 6.9% decrease   | 0.8% decrease  |
| 6              | 47.7% decrease | 24.1% decrease | 14.9% increase  | 25.7% decrease |

Table 1. Calculated percentage change in soil nutrient content (mg l<sup>-1</sup>) from 2020 to 2021 per gridded sample point for Site 3 sub-field C.

## Conclusions

Reseeded is an effective method of reducing surface soil nutrient accumulations. However, it is unclear whether the associated soil disturbance will increase overall soil nutrient and sediment loss which would be detrimental to local water quality

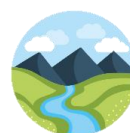

## References

- Schulte, R. P. O. et al. (2010) 'Modelling soil phosphorus decline: Expectations of Water Framework Directive policies', *Environmental Science & Policy*, Elsevier, 13(6), pp. 472-484. doi: 10.1016/j.envsci.2010.06.002.
- Bailey, J. S. (2015) 'Assessing the effectiveness of manure export plus intensive silage cropping for lowering the Olsen-P status of P-enriched grassland', *Soil Use and Management*. John Wiley & Sons, Ltd, 31(4), pp. 438-439. doi: 10.1111/SUM.12226.
- Walt, D. P. et al. (2013) 'Forecasting the decline of excess soil phosphorus in agricultural catchments', *Soil Use and Management*. John Wiley & Sons, Ltd, 29(SUPPL. 1), pp. 147-154. doi: 10.1111/1475-2743.120413.X.
- Baker, D. B. et al. (2017) 'Vertical Stratification of Soil Phosphorus as a Concern for Dissolved Phosphorus Runoff in the Lake Erie Basin', *Journal of Environmental Quality*. John Wiley & Sons, Ltd, 46(6), pp. 1287-1295. doi: 10.2134/jeq2016.09.0337.
- Sharpley, A. N. (2003) 'Soil Mixing to Decrease Surface Stratification of Phosphorus in Manured Soils', *Journal of Environment Quality*, 32(4), p. 1375. doi: 10.2134/jeq2003.1375.
- Watkins, M. et al. (2012) 'Nitrogen and phosphorus changes in soil and soil water after cultivation', *Applied and Environmental Soil Science*, 2012. doi: 10.1155/2012/157068.

Research funding made available via NERC/UKRI QUADRAT DTP  
For further information contact: ehayes07@qub.ac.uk

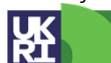

Natural Environment Research Council

## Acknowledgements

Thanks go to AFBI (Agri-Food and Biosciences Institute) for fieldwork assistance

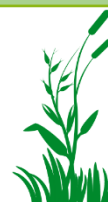

Supplement: s1 [file s1]
